# Supplementary material for: iMulti-HumPhos: a multi-label classifier for identifying human phosphorylated proteins using multiple kernel learning based support vector machines
Source: Royal Society of Chemistry journal article supplement (doi:10.1039/c7mb00180k), 2017-06-16
Supplement: c7mb00180k1.pdf [file c7mb00180k1.pdf]

**Table S1 Selected C and  $\sigma$  of 5 complete runs of the 5-fold cross-validation for RBF kernel based SVM**

| No. of<br>Completes<br>Run | Type of Phosphorylation |                |                  |                |                 |                |
|----------------------------|-------------------------|----------------|------------------|----------------|-----------------|----------------|
|                            | Phosphoserine           |                | Phosphothreonine |                | Phosphotyrosine |                |
|                            | C                       | $\sigma$       | C                | $\sigma$       | C               | $\sigma$       |
| 1 <sup>st</sup>            | 2 <sup>1</sup>          | 2 <sup>3</sup> | 2 <sup>4</sup>   | 2 <sup>3</sup> | 2 <sup>4</sup>  | 2 <sup>3</sup> |
| 2 <sup>nd</sup>            | 2 <sup>1</sup>          | 2 <sup>3</sup> | 2 <sup>2</sup>   | 2 <sup>3</sup> | 2 <sup>3</sup>  | 2 <sup>2</sup> |
| 3 <sup>rd</sup>            | 2 <sup>0</sup>          | 2 <sup>3</sup> | 2 <sup>3</sup>   | 2 <sup>3</sup> | 2 <sup>3</sup>  | 2 <sup>3</sup> |
| 4 <sup>th</sup>            | 2 <sup>1</sup>          | 2 <sup>3</sup> | 2 <sup>4</sup>   | 2 <sup>3</sup> | 2 <sup>3</sup>  | 2 <sup>3</sup> |
| 5 <sup>th</sup>            | 2 <sup>1</sup>          | 2 <sup>3</sup> | 2 <sup>3</sup>   | 2 <sup>3</sup> | 2 <sup>2</sup>  | 2 <sup>3</sup> |
